# Supplementary material for: Enhancing the electrochromic stability of Prussian blue based on TiO2 nanorod arrays
Source: Royal Society of Chemistry journal article supplement (doi:10.1039/c9nj05520g), 2020-01-01
Supplement: c9nj05520g1.pdf [file c9nj05520g1.pdf]

# Enhancing the Electrochromic Stability of Prussian Blue Based on TiO<sub>2</sub> Nanorod Arrays

*Hongbo Xu<sup>a#</sup>, Liuting Gong<sup>a#</sup>, Shengyu Zhou<sup>a</sup>, Kangli Cao<sup>c</sup>, Shen Wang<sup>a</sup>, Jiupeng Zhao<sup>a\*</sup> and Yao, Li<sup>b</sup>*

a MIIT Key Laboratory of Critical Materials Technology for New Energy Conversion and Storage, School of Chemistry and Chemical Engineering, Harbin Institute of Technology, 150001, Harbin, China.

b National Key Laboratory of Science and Technology on Advanced Composites in Special Environments, Harbin Institute of Technology, 150001, Harbin, China.

c Shanghai Institute of Spacecraft Equipment, Shanghai, 200240.

# Hongbo Xu, Liuting Gong contributed equally to this work.

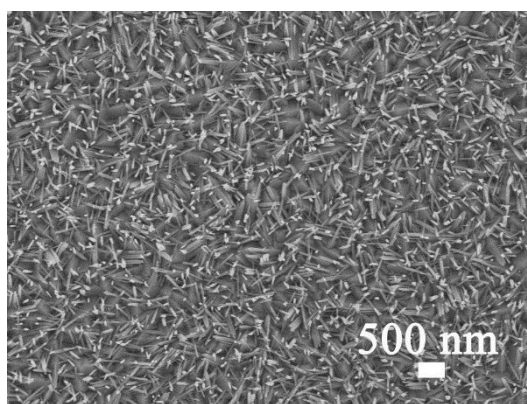

Figure S1. SEM images of the TNRA on FTO.

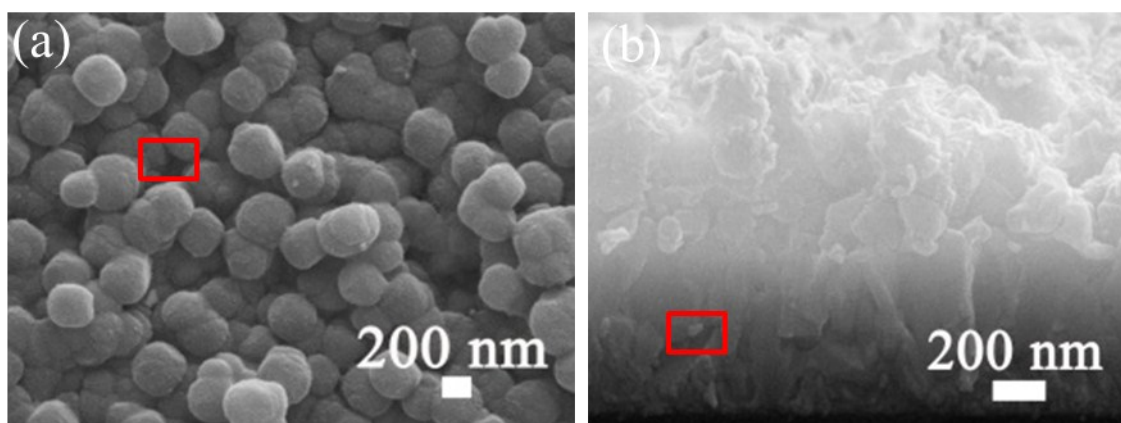

Figure S2. SEM images of the PB/TNRA/FTO. This red area shows a crack of the PB/TNRA/FTO.

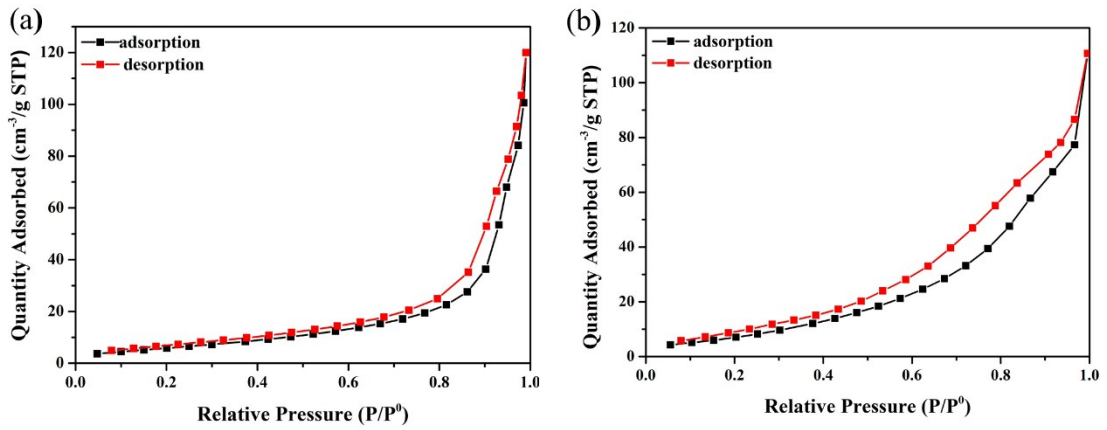

Figure S3. Nitrogen adsorption/desorption isotherms of the PB (a) and PB/TNRA (b).

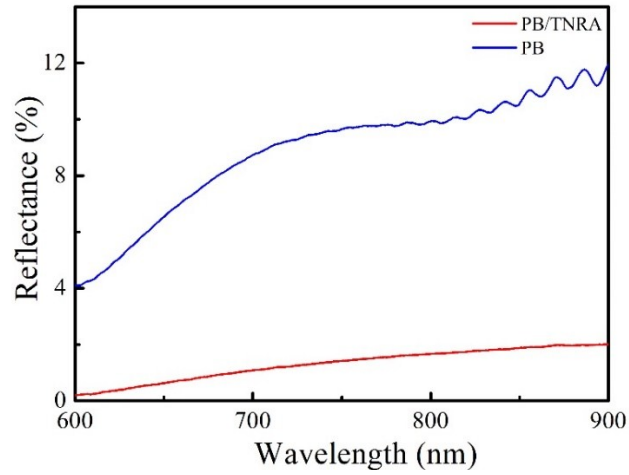

Figure S4. Reflectance spectra of the PB and PB/TNRA film in the range from 600 to 900 nm.

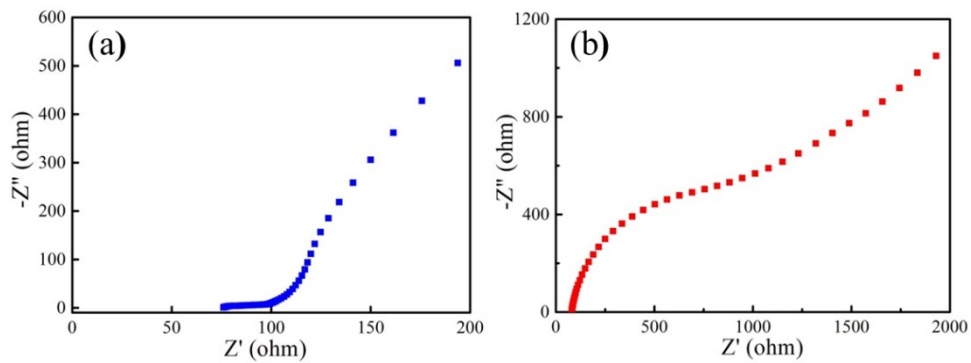

Figure S5. Nyquist plots of (a) PB and (b) PB/TNRA film.

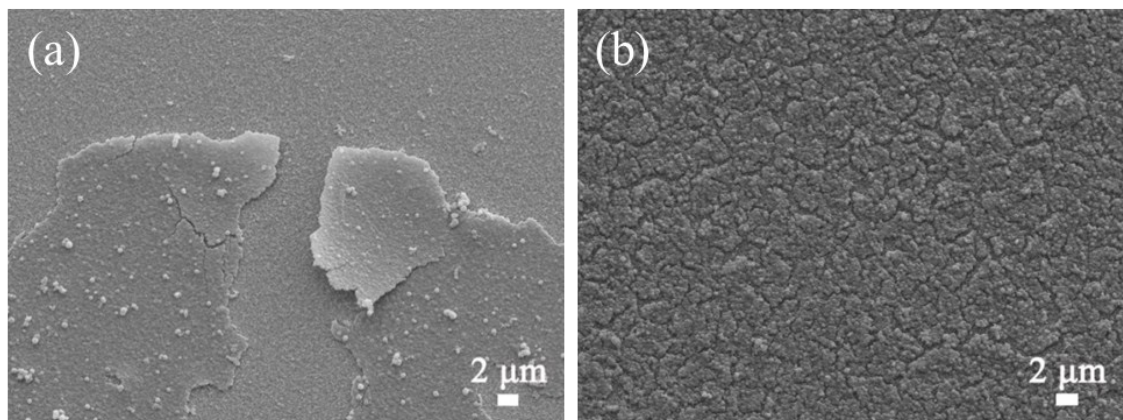

Figure S6. SEM images of (a) PB/FTO and (b) PB/TNRA/FTO/ after 1000 cycle.
